# Supplementary material
Source: PubMed Central journal article supplement (PMC6856320)
Supplement: AEM.01611-19-s0001.pdf [file AEM.01611-19-s0001.pdf]

**Supplemental Appendix for:**

**Identification of a virulence factor in the banana pathogen *Dickeya zeae* MS2**

Luwen Feng, Amy L. Schaefer, Ming Hu, Ruiyi Chen,  
E. Peter Greenberg and Jianuan Zhou

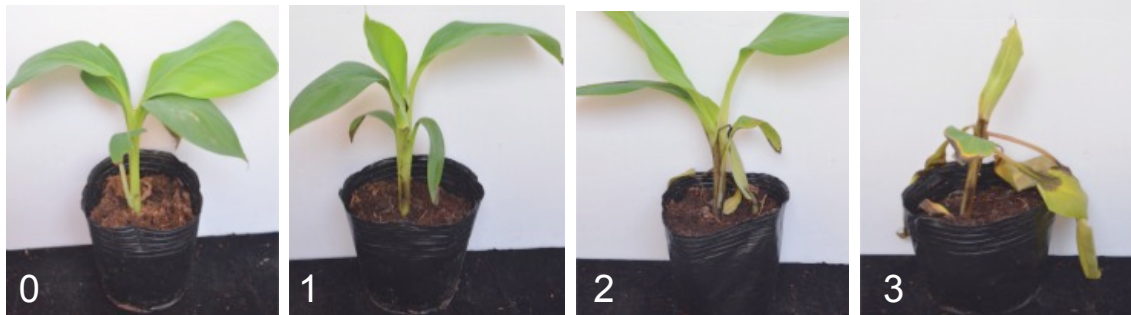

**Figure S1.** Virulence scoring for *Dickeya zea* MS2 banana disease. Images are banana seedlings 7 days post-inoculation. The assays were based on those described elsewhere (1). The numbers (0-3) correlate to disease severity. (0) no visible infection symptoms; (1) discoloration only at the inoculation point on the stem; (2) discoloration and soft rot spread throughout the stem; (3) discoloration and soft rot spread from stem to leaves or growing point, and/or the plant can no longer support leaf weight.

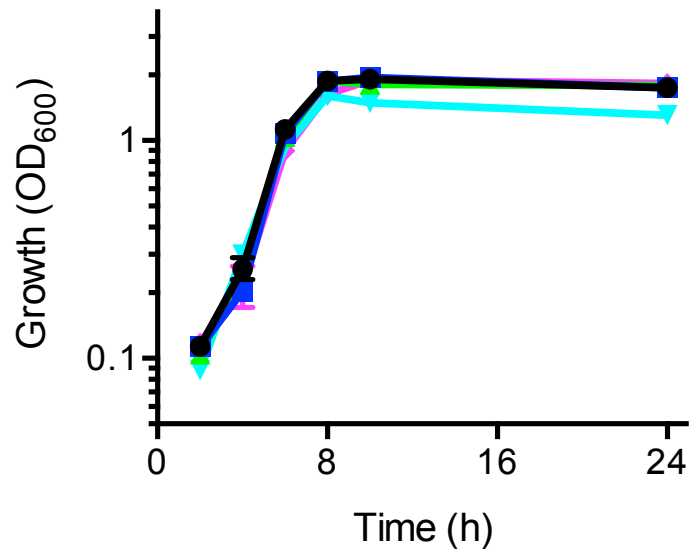

**Figure S2.** Growth of MS2 and MS2 mutants in LB at 30°C with shaking (25-ml volume). Wildtype MS2 (black), The ExpR mutant  $\Delta expR$  (pink), The Expl mutant  $\Delta expl$  (teal), the PipR mutant  $\Delta pipR$  (green), and the PipA mutant  $\Delta pipA$  (blue). Data are means of three experiments and the error bars represent the range.

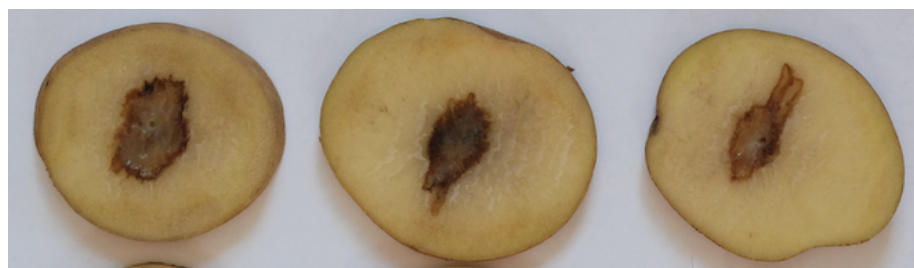

WT

$\Delta expR$

$\Delta expl$

| Exoenzyme          | WT  | $\Delta expR$ | $\Delta expl$ |
|--------------------|-----|---------------|---------------|
| Cellulase          | 100 | 99.6 (0.001)  | 99.7 (0.003)  |
| Pectate lyase      | 100 | 99.9 (0.002)  | 99.7 (0.002)  |
| Polygalactouranase | 100 | 100.0 (0.006) | 99.8 (0.009)  |
| Protease           | 100 | 99.9 (0.002)  | 99.8 (0.002)  |

**Figure S3.** (Top) Potato-slice infections with wildtype (WT) *D. zeae* MS2 and strains with mutations in *expR* ( $\Delta expR$ ) and *expl* ( $\Delta expl$ ) mutants. Potato tuber assays were as described previously (2), except that potato slices were 1 cm thick and incubated at 30°C. (Bottom) Exoenzyme activity measured as described previously (3). Data are mean values of 3 biological replicates (+/- SD) normalized to the MS2 wildtype (WT) strain.

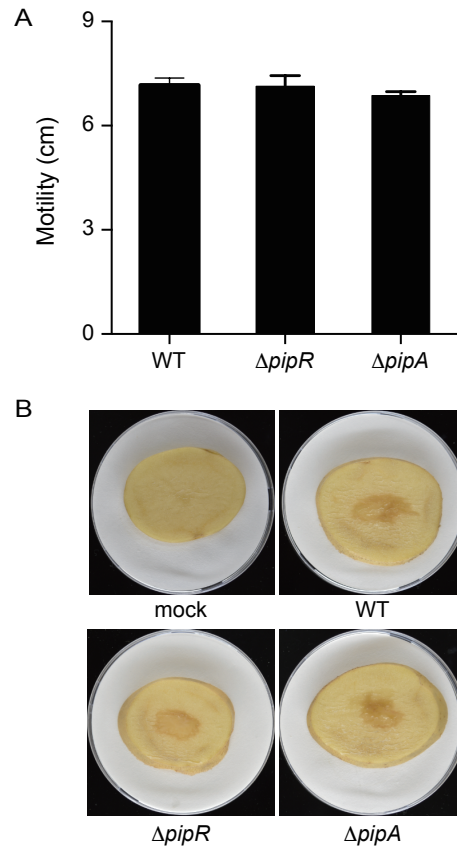

**Figure S4.** The PipR ( $\Delta pipR$ ) and PipA ( $\Delta pipA$ ) mutants are indistinguishable from the MS2 wildtype (WT) in swimming motility and potato tuber assays. (A) Swimming motility assays measuring the distance traveled by the indicated strain during 24 hours as described in MATERIALS AND METHODS. (B) Potato slice assays prepared as described in Figure S3 above.

## SUPPLEMENTAL APPENDIX REFERENCES

1. Down, J. M., Clarke, B. R., Milligan, D. E., Tang, J. L. & Daniels, M. J. (1990) Extracellular proteases from *Xanthomonas campestris* pv. *campestris*, the black rot pathogen. *Appl Environ Microbiol* 56: 2994-2998.
2. Hussain, B. M., Zhang, H. B., Xu, J. L., Liu, Q., Jiang, Z. & Zhang, L. H. (2008) The acyl-homoserine lactone-type quorum-sensing system modulates cell motility and virulence of *Erwinia chrysanthemi* pv *zeae*. *J Bacteriol* 190: 1045-1053.
3. Hu, M., Li, J., Chen, R., Li, W., Feng, L., Shi, L., Xue, Y., Feng, X., Zhang, L. & Zhou, J. (2018) *Dickeya zeae* strains isolated from rice, banana and clivia rot plants show great virulence differentials. *BMC Microbiol* 18: 136.
